# Supplementary material for: Charge carrier transport and contact selectivity limit the operation of PTB7-based organic solar cells of varying active layer thickness
Source: Royal Society of Chemistry journal article supplement (doi:10.1039/c3ta12358h), 2013-01-01
Supplement: c3ta12358h.pdf [file c3ta12358h.pdf]

## ***Supporting Information***

# **Charge Carrier Transport and Contact Selectivity Limit the Operation of PTB7-Based Organic Solar Cells of Varying Active Layer Thickness**

Antonio Guerrero<sup>1</sup>, Nuria Fernández-Montcada<sup>2</sup>, Jon Ajuria<sup>3,4</sup>, Ikerne Etxebarria<sup>3,4</sup>, Roberto Pacios<sup>3,4</sup>, Germà Garcia-Belmonte<sup>1\*</sup>, and Emilio Palomares<sup>\*2,5</sup>

<sup>1</sup>*Photovoltaic and Optoelectronic Devices Group, Departament de Física, Universitat Jaume I, ES-12071 Castelló, Spain*

<sup>2</sup>*Institute of Chemical Research of Catalonia (ICIQ). Avda. Països Catalans 16. Tarragona. E-43007. Spain.*

<sup>3</sup>*IK4-IKERLAN, Goiru Kalea, 20500 Arrasate. Spain*

<sup>4</sup>*CIC microGUNE, 20500 Arrasate, Spain*

<sup>5</sup>*ICREA. Passeig Lluís Companys, 23. Barcelona E-08010. Spain.*

\*Corresponding authors: G. Garcia-Belmonte, e-mail: [garciag@fca.uji.es](mailto:garciag@fca.uji.es), tel.: +34 964387548, and Emilio Palomares, email : [epalomares@iciq.es](mailto:epalomares@iciq.es), tel. +34977920241.

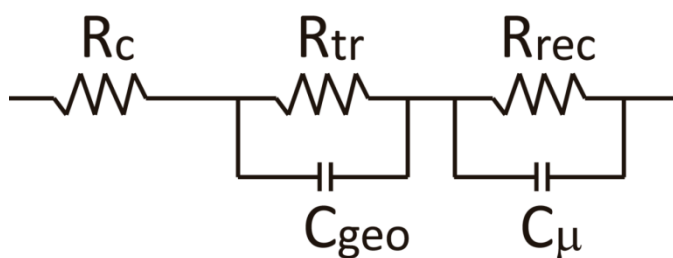

**Figure SI1:** Equivalent circuit model used in this work.  $R_c$  is the series resistance due to contacts and wires.  $R_{tr}$  is a resistance to transport of carriers observed at high frequency for systems limited by transport of carriers.  $R_{rec}$  is the recombination resistance observed at low frequency.  $C_{geo}$  is the geometrical capacitance of the device and  $C_{\mu}$  a chemical capacitance.

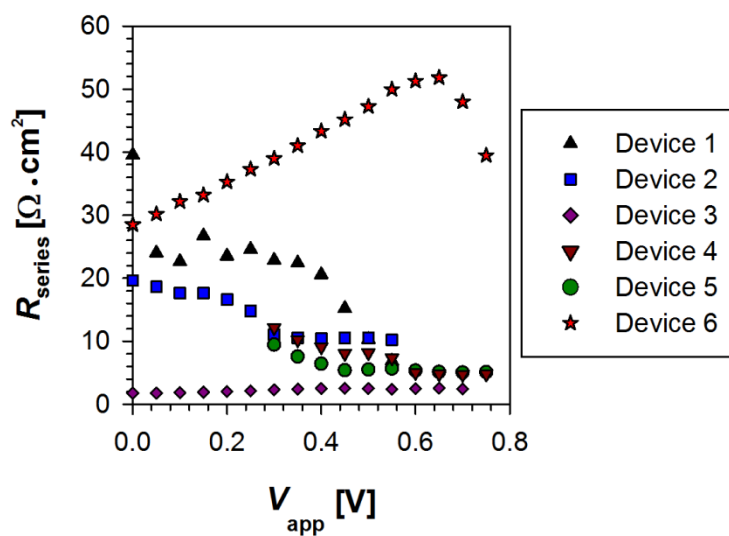

**Figure SI2:** Calculated total series resistance using Impedance Spectroscopy taking into account the contact resistance and response at high frequencies ( $R_{series} = R_c + R_{tr}$ )

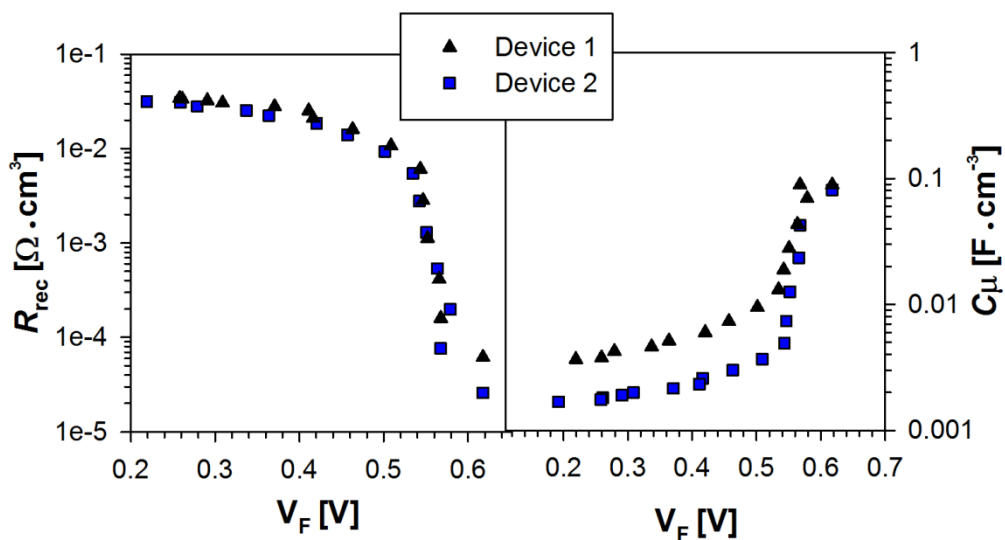

**Figure S13:** Recombination resistance ( $R_{rec}$ ) and Chemical capacitance ( $C_{\mu}$ ) as a function of the applied voltage corrected to take into account the voltage drop due to the series resistance ( $V_F = V_{app} - j \cdot R_{series}$ ).

#### Capacitance-Voltage analysis

| Active Layer | Donor:Acceptor Ratio | Thickness | $V_{FB}$ [V] | Fullerene cathode Fullerene Coverage [%] |
|--------------|----------------------|-----------|--------------|------------------------------------------|
| P3HT         | 1:0                  | 100 nm    | 1.42         | 0                                        |
| P3HT:PCBM    | 1:6                  | 200 nm    | 0.32         | 100                                      |
| Device 1     | 1:1                  | 100 nm    | 0.450        | 90                                       |
| Device 2     | 1:1                  | 270 nm    | 0.377        | 95                                       |
| PTB7         | 1:0                  | 100 nm    | 1.30         | 0                                        |
| PTB7:PCBM    | 1:6                  | 200 nm    | 0.52         | 100                                      |
| Device 3     | 1:3                  | 100 nm    | 0.673        | 80                                       |
| Device 4     | 1:3                  | 100 nm    | 0.633        | 85                                       |
| Device 5     | 1:1                  | 100 nm    | 1.022        | 35                                       |
| Device 6     | 1:1                  | 270 nm    | 0.770        | 65                                       |

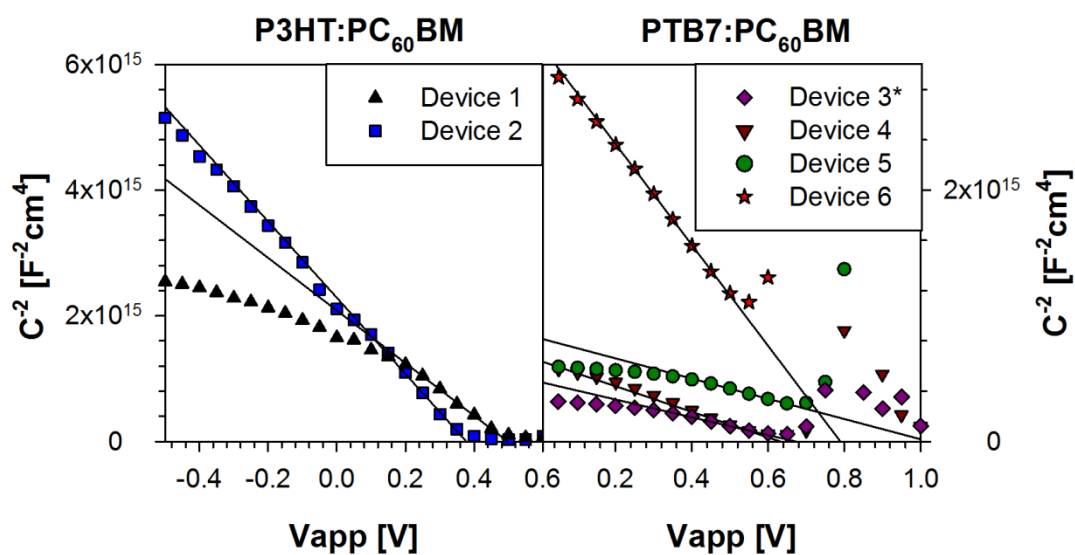

Figure SI4: Mott-Schottky analysis of devices fabricated in this work. Measurements have been carried out at a frequency of 1 kHz and dark conditions. \*PC<sub>70</sub>BM and DIO were used as acceptor molecule and additive, respectively.
